# Supplementary material for: Molecularly Distinct NLRP3 Inducers Mediate Diverse Ratios of Interleukin-1β and Interleukin-18 from Human Monocytes
Source: Hindawi journal article supplement (doi:10.1155/2020/4651090), 2020-10-22
Supplement: f1 [file 4651090.f1.pdf]

## Supplementary Materials

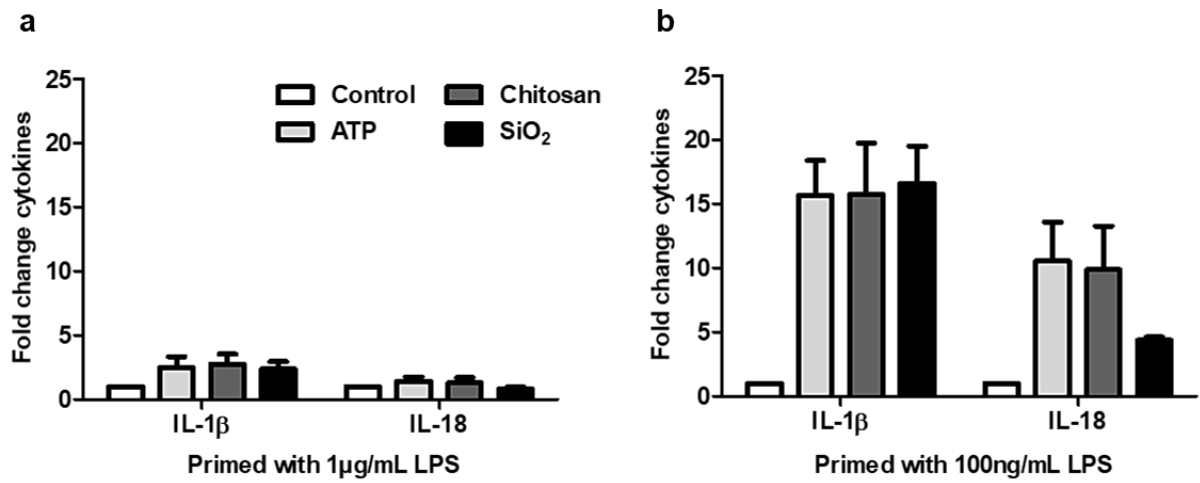

Supplementary Figure 1. Different doses of LPS affects the release of inflammasome cytokines. The concentration of released IL-1 $\beta$  and IL-18 were detected 24 h after stimulation of THP-1 cells with ATP, chitosan and SiO<sub>2</sub>. Cells were primed with (a) 1  $\mu$ g/mL or (b) 100 ng/mL LPS prior to stimulation. The concentration cytokines were normalized against the mean of the control (primed with LPS). Data are shown as mean  $\pm$  SD from six individual experiments.

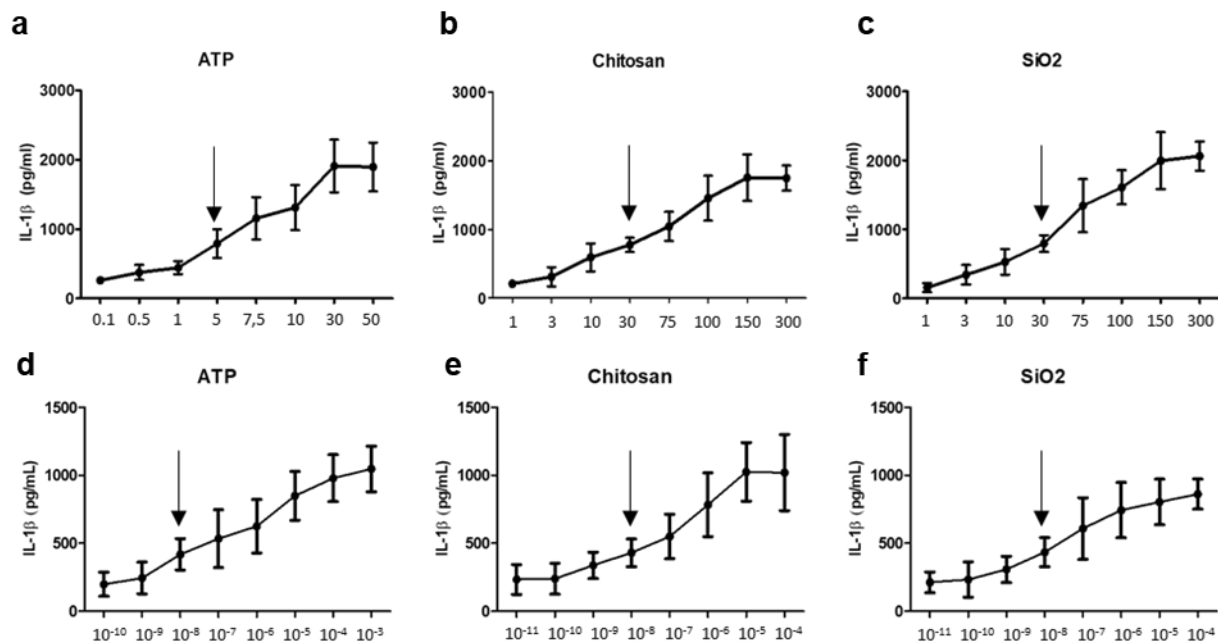

Supplementary figure 2. Dose-response of the inflammasome inducers ATP, chitosan and SiO<sub>2</sub>. Undifferentiated THP-1 cells were primed with LPS and stimulated with increasing doses of (a) ATP (mM), (b) chitosan ( $\mu$ g/mL) or (c) SiO<sub>2</sub> ( $\mu$ g/mL). Isolated primary monocytes were primed with LPS and stimulated with increasing doses of (d) ATP (M), (e) chitosan (g/mL) or (f) SiO<sub>2</sub> (g/mL). The concentration of released IL-1 $\beta$  were measured 24h after stimulation. The selected doses are marked with arrows. Data are shown as mean  $\pm$  SD from three individual experiments.

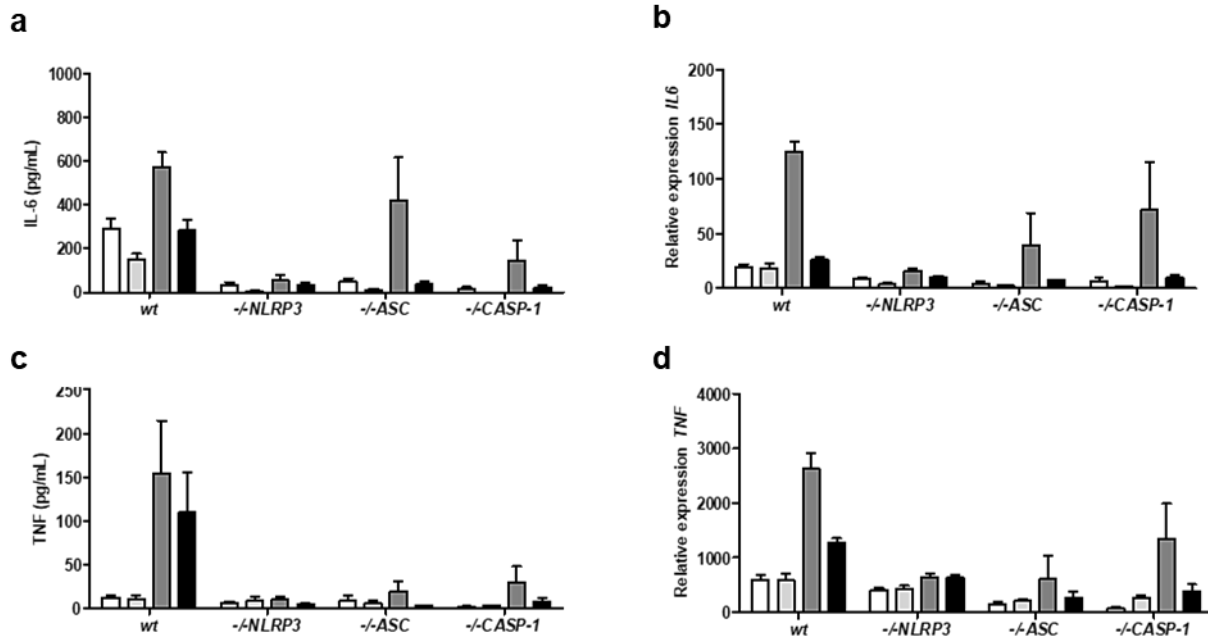

Supplementary figure 3. Lack of inflammasome components affect inflammasome-independent cytokines. THP-1 monocytes with functional NLRP3 inflammasome (wt) and inflammasome deficient THP-1 cells, lacking either functional NLRP3, ASC or caspase-1 proteins, were primed with LPS and stimulated with ATP, chitosan or SiO<sub>2</sub> for 24 h. Controls were treated with LPS alone. The concentration of released (a) IL-6, and (c) TNF were measured. The relative expression of (b) IL-6, and (d) TNF shown are compared to reference genes TBP and HPRT1. Data are shown as mean  $\pm$  SD from six individual experiments.

Supplementary Table I Release of non-inflammasome related cytokine and chemokines. The human inflammatory panel 1 (BioLegend), a multiplex bead-based flow cytometry detection, were used according to manufacturer's instructions to detect the concentrations of selected cytokines and chemokines from LPS-primed THP-1 cells following stimulation with ATP, chitosan or SiO<sub>2</sub> for 24h. Some cytokines could not be detected (ND) within the range of the kit. Data (in pg/mL) are shown as mean from six individual experiments.

|               | Neg. control | Control | ATP   | Chitosan | SiO <sub>2</sub> |
|---------------|--------------|---------|-------|----------|------------------|
| CCL-2         | 54           | 622     | 4 433 | 7 166    | 7 846            |
| CXCL-8        | 5            | 549     | 5 712 | 5 517    | 5 357            |
| IFN-A         | ND           | ND      | ND    | ND       | ND               |
| IFN- $\gamma$ | ND           | ND      | ND    | ND       | ND               |
| IL-6          | ND           | 293     | 148   | 570      | 285              |
| IL-10         | ND           | 8       | 2     | 21       | 24               |
| IL-12         | ND           | ND      | ND    | ND       | 3                |
| IL-17         | ND           | 3       | 3     | 5        | 6                |
| IL-23         | 8            | 62      | 68    | 68       | 96               |
| IL-33         | ND           | 27      | 29    | 58       | 50               |
| TNF           | 1            | 12      | 11    | 153      | 110              |
